# Supplementary material for: Biochemical and Structural Studies of Conserved Maf Proteins Revealed Nucleotide Pyrophosphatases with a Preference for Modified Nucleotides
Source: PubMed Central journal article supplement (PMC3899018; doi:10.1016/j.chembiol.2013.09.011), 2013-11-21

**Supplemental Information**

**Biochemical and Structural Studies of Conserved  
Maf Proteins Revealed Nucleotide Pyrophosphatases  
with a Preference for Modified Nucleotides**

**Anatoli Tchigvintsev, Dmitri Tchigvintsev, Robert Flick, Ana Popovic, Aiping Dong,  
Xiaohui Xu, Greg Brown, Wenyun Lu, Hong Wu, Hong Cui, Ludmila Dombrowski,  
Jeong Chan Joo, Natalia Beloglazova, Jinrong Min, Alexei Savchenko, Amy A.  
Caudy, Joshua D. Rabinowitz, Alexey G. Murzin, and Alexander F. Yakunin**

**Table S1, related to Figure 1.** List of modified nucleoside triphosphates used for screening of purified Maf proteins.

|                                                      |                                                     |
|------------------------------------------------------|-----------------------------------------------------|
| 1. 2',3'-ddATP                                       | 30. 5-propynyl-2'-deoxycytidine-5'-triphosphate     |
| 2. 2'-deoxyuridine-5'-triphosphate                   | 31. 6-azauridine-5'-triphosphate                    |
| 3. 2-amino-2'-dATP                                   | 32. 6-chloropurine-2'-deoxyriboside-5'-triphosphate |
| 4. 2-amino-6-chloropurineriboside-5'-triphosphate    | 33. 6-chloropurineriboside-5'-triphosphate          |
| 5. 2-amino-6-Cl-purine-2'-deoxyriboside-triphosphate | 34. 6-mercaptopurine-riboside-5'-triphosphate       |
| 6. 2-amino-ATP                                       | 35. 6-methylthio-ITP                                |
| 7. 2-aminopurine-2'-deoxyriboside-triphosphate       | 36. 7-deaza-2'-deoxyguanosine-5'-triphosphate       |
| 8. 2'-dITP                                           | 37. 7-methyl-GTP                                    |
| 9. 2'-dUTP                                           | 38. 8-[(4-amino)butyl]-amino-ATP                    |
| 10. 2'-O-methyl-GTP                                  | 39. 8-[(6-amino)hexyl]-amino-GTP                    |
| 11. 3'-O-methyl-ATP                                  | 40. 8-bromo-GTP                                     |
| 12. 3'-O-methyl-GTP                                  | 41. 8-iodo-GTP                                      |
| 13. 5-aminoallyl-2'-deoxycytidine-5'-triphosphate    | 42. 8-oxo-2'-deoxyadenosine-5'-triphosphate         |
| 14. 5-aminoallylcytidine-5'-triphosphate             | 43. 8-oxo-2'-deoxyguanosine-5'-triphosphate         |
| 15. 5-bromo-2'-deoxycytidine-5'-triphosphate         | 44. 8-oxo-GTP                                       |
| 16. 5-bromo-CTP                                      | 45. 8-oxo-GTP                                       |
| 17. 5-bromocytidine-5'-triphosphate                  | 46. gamma-aminophenyl-ATP                           |
| 18. 5-bromo-UTP                                      | 47. N1-methyl-GTP                                   |
| 19. 5-fluoro-UTP                                     | 48. N2-methyl-2'-deoxyguanosine-5'-triphosphate     |
| 20. 5-hydroxymethyl dCTP                             | 49. N4-methyl-2'-dCTP                               |
| 21. 5-iodo-2'-deoxyuridine-5'-triphosphate           | 50. N6-(4-amino)butyl-ATP                           |
| 22. 5-iodo-CTP                                       | 51. N6-methyl-2'-deoxyadenosine-5'-triphosphate     |
| 23. 5-iodo-dUTP                                      | 52. N6-methyladenosine-5'-triphosphate              |
| 24. 5-iodouridine-5'-triphosphate                    | 53. N6-methyl-ATP                                   |
| 25. 5-methyl-2'-deoxycytidine-5'-triphosphate        | 54. O6-methyl-2'-deoxyguanosine-5'-triphosphate     |
| 26. 5-methyl-CTP                                     | 55. O6-methyl-GTP                                   |
| 27. 5-methyl-dCTP                                    | 56. pseudouridine-5'-triphosphate                   |
| 28. 5-methyl-UTP (aka riboTTP)                       | 57. xanthosine 5'-triphosphate                      |
| 29. 5-OH-2'-dCTP                                     |                                                     |

**Table S2, related to Figure 3.** Data collection and refinement statistics for the crystal structures of ASMTL-Maf, BSU28050, and YceF.

|                                                     | ASMTL-Maf                        | BSU28050                                      | YceF wt                                       | YceF D69A                                     |
|-----------------------------------------------------|----------------------------------|-----------------------------------------------|-----------------------------------------------|-----------------------------------------------|
| <b>PDB Code</b>                                     | 2P5X                             | 4HEB                                          | 4JHC                                          | 4LU1                                          |
| <b>Data collection</b>                              |                                  |                                               |                                               |                                               |
| Space group                                         | P2 <sub>1</sub> 2 <sub>1</sub> 2 | P2 <sub>1</sub> 2 <sub>1</sub> 2 <sub>1</sub> | P2 <sub>1</sub> 2 <sub>1</sub> 2 <sub>1</sub> | P2 <sub>1</sub> 2 <sub>1</sub> 2 <sub>1</sub> |
| Cell dimensions                                     |                                  |                                               |                                               |                                               |
| <i>a</i> , <i>b</i> , <i>c</i> (Å)                  | 84.8, 117.0, 51.5                | 61.5, 86.0, 95.0                              | 50.4, 52.9, 128.9                             | 50.7, 52.8, 129.3                             |
| $\alpha$ , $\beta$ , $\gamma$ (°)                   | 90, 90, 90                       | 90, 90, 90                                    | 90, 90, 90                                    | 90, 90, 90                                    |
| Resolution (Å) <sup>a</sup>                         | 50.00-2.00<br>(2.07-2.00)        | 50.00-2.26<br>(2.30-2.26)                     | 50.00-1.85<br>(1.88-1.85)                     | 50.00-1.92<br>(1.95-1.92)                     |
| <i>R</i> <sub>merge</sub>                           | 10.2 (92.6)                      | 10.7 (88.4)                                   | 4.3(58.6)                                     | 6.6(64.4)                                     |
| <i>I</i> / $\sigma$ <i>I</i>                        | 14.4 (2.0)                       | 19.7 (1.9)                                    | 37.4(2.0)                                     | 30.4(1.8)                                     |
| Completeness (%)                                    | 99.7 (99.3)                      | 99.9 (99.7)                                   | 99.9(99.7)                                    | 99.3(95.1)                                    |
| Redundancy                                          | 6.9 (6.6)                        | 7.3 (7.3)                                     | 7.6(5.7)                                      |                                               |
| <b>Refinement</b>                                   |                                  |                                               |                                               |                                               |
| Resolution (Å)                                      | 25.00 – 2.00                     | 25.7-2.26                                     | 31.8-1.85                                     | 33.4-1.92                                     |
| Number of reflections                               | 35334                            | 24200                                         | 29318                                         | 26175                                         |
| <i>R</i> <sub>work</sub> / <i>R</i> <sub>free</sub> | 20.1/25.3                        | 21.5/25.0                                     | 19.3/24.7                                     | 19.9/24.9                                     |
| Number of atoms                                     |                                  |                                               |                                               |                                               |
| Protein                                             | 3190                             | 2773                                          | 2907                                          | 2837                                          |
| Phosphate                                           | 10                               |                                               |                                               |                                               |
| Water                                               | 333                              | 89                                            | 191                                           | 139                                           |
| B-factors (Å <sup>2</sup> )                         |                                  |                                               |                                               |                                               |
| Protein                                             | 22.5                             | 51.0                                          | 31.1                                          | 34.9                                          |
| Phosphate                                           | 54.1                             |                                               |                                               |                                               |
| Water                                               | 37.8                             | 46.7                                          | 35.3                                          | 39.2                                          |
| R.m.s. deviations                                   |                                  |                                               |                                               |                                               |
| Bond lengths (Å)                                    | 0.02                             | 0.01                                          | 0.013                                         | 0.008                                         |
| Bond angles (°)                                     | 1.4                              | 1.1                                           | 1.1                                           | 1.272                                         |
| <b>Ramachandran plot</b>                            |                                  |                                               |                                               |                                               |
| Favored (%)                                         | 97.0                             | 98.1                                          | 98.0                                          | 97.3                                          |
| Additionally allowed (%)                            | 3.0                              | 1.9                                           | 2.0                                           | 2.7                                           |
| Disallowed (%)                                      | 0.0                              | 0.0                                           | 0.0                                           | 0.0                                           |

<sup>a</sup> Values in parentheses are for the highest-resolution shell.

**Figure S1, related to Figures 4, and 5 . Structure-based sequence alignment of two sub-families of Maf proteins. (A), YhdE sub-family. (B), YceF sub-family.** The secondary structure elements are shown above and below the alignment. Residues conserved in all aligned proteins are boxed with the Maf motif residues highlighted in orange, whereas the signature residues for the YhdE and YceF sub-families are highlighted in green and yellow, respectively. The residues mutated in this work are marked with black triangles and numbered. The proteins compared are: (A), *E. coli* YhdE (P25536), *B. subtilis* BSU28050 (Q02169), *Pyrococcus furiosus* PF0216 (Q8U476), *Methanosarcina barkeri* Mbar\_A1652, *S. cerevisiae* YOR111W (Q99210), human ASMTL-Maf (O95671); (B), *E. coli* YceF (P0A729), *Salmonella typhimurium* YceF (STM1189, P58627), *Dictyostelium dsicoideum* (Q54TC5), *Pseudomonas aeruginosa* PA2972 (Q9HZN2), and *T. brucei* Tb11.01.5890 (Q382A9).

**A**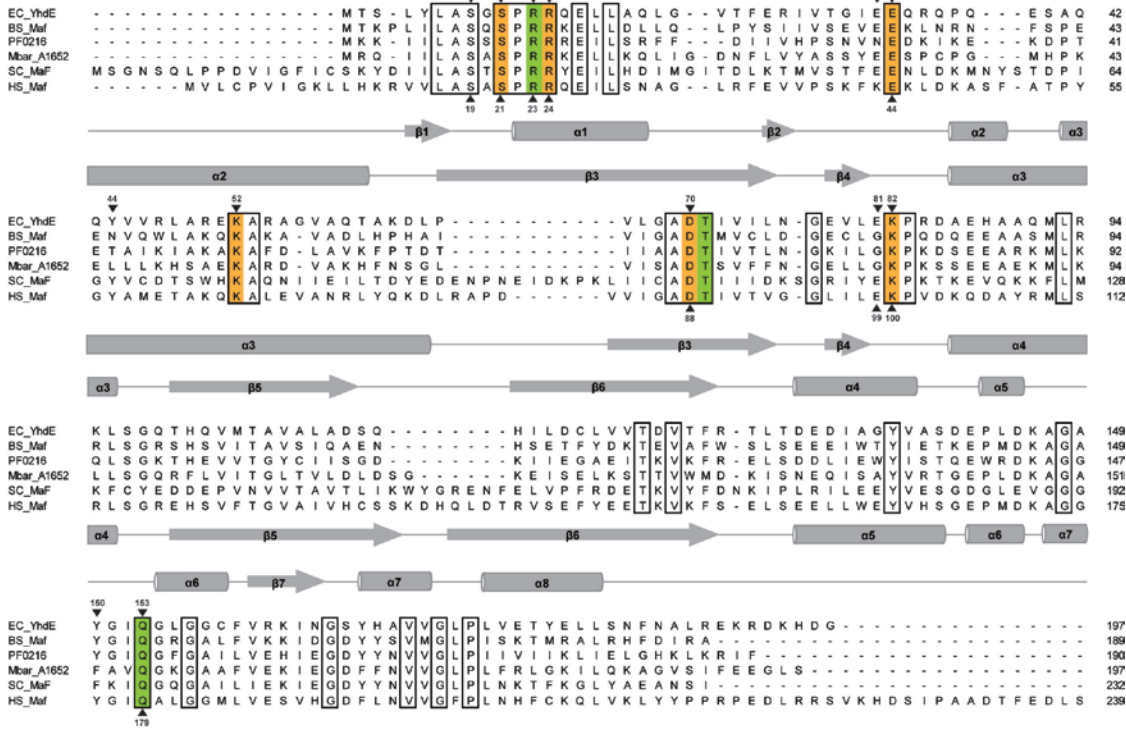**B**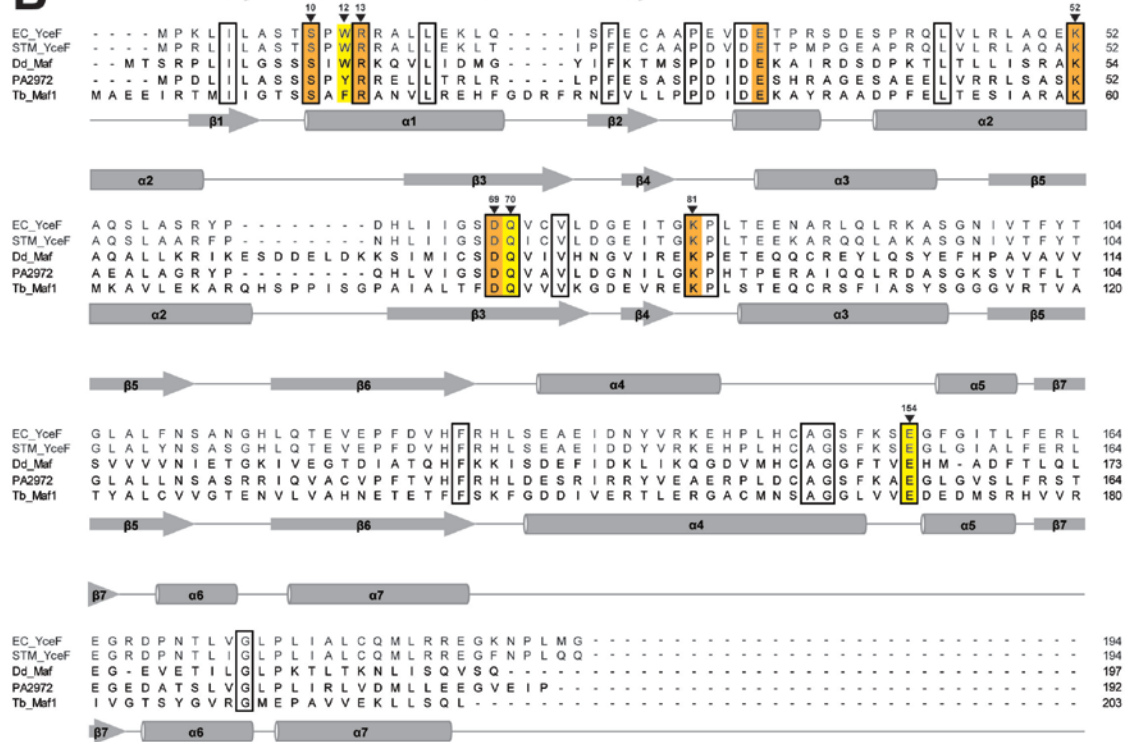

**Figure S2, related to Figure 1.** Effect of divalent metal ions on pyrophosphatase activity of purified Maf proteins. Metal ion profiles of purified Maf proteins were analyzed using two different assays: a pyrophosphatase-coupled method (**A, B, C**) and an HPLC-based method (**D, E, F**). (**A, B, C**), Hydrolysis of UTP (0.2 mM) by YhdE (A, 0.5  $\mu$ g), YOR111W (B; 0.1  $\mu$ g), or ASMTL-Maf (C; 0.5  $\mu$ g) was analyzed in the presence of saturating concentrations of  $Mg^{2+}$  (5 mM),  $Mn^{2+}$  (1 mM),  $Zn^{2+}$  (0.5 mM), or  $Co^{2+}$  (2 mM). (**D, E, F**), Hydrolysis of UTP (10 mM) by YhdE (D, 10  $\mu$ g), YOR111W (E, 10  $\mu$ g), or ASMTL-Maf (F, 10  $\mu$ g) in the presence of different metal ions (as in A, B, C). The HPLC assay data are presented as a relative activity related to the activity of enzyme in the presence of  $Co^{2+}$ . Results are means  $\pm$  S.D. from at least two independent determinations.

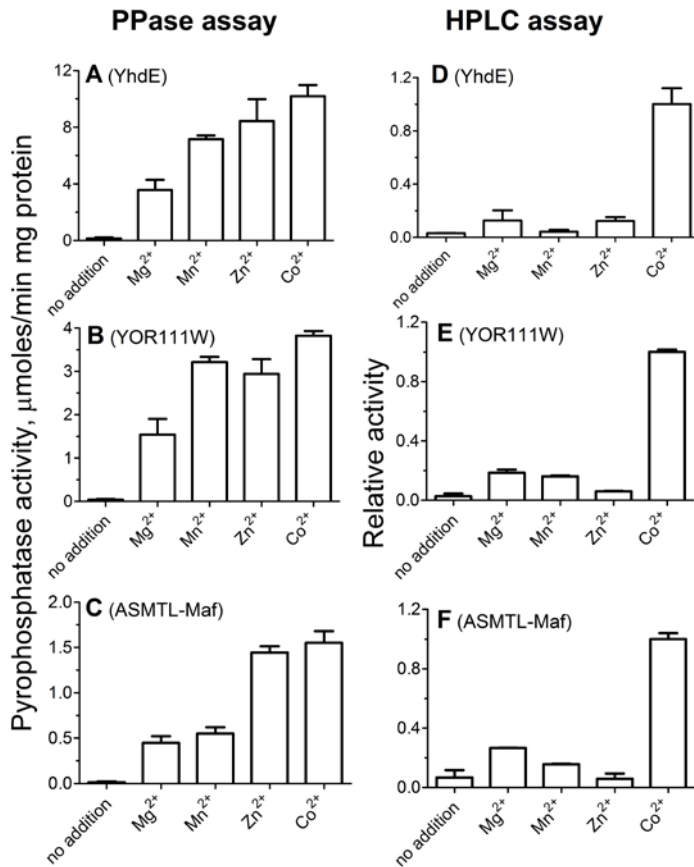

**Figure S3, related to Figure 2.** LC-MS analysis of ATP, GTP, and CTP in the *E. coli* cells over-expressing the wild type YhdE and YceF, as well as the inactive YhdE D70A mutant proteins. The *E. coli* BW25113 strain containing an empty protein expression plasmid pCA24N was used as a control. Results are means  $\pm$  S.D. from at least two independent determinations.

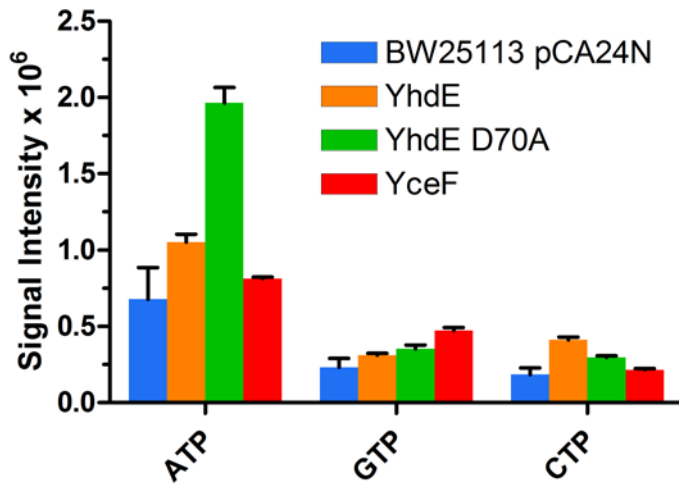

**Figure S4, related to Figure 5 and Table 1.** A pH-rate profile analysis of YOR111W: hydrolysis of dTTP. The reaction  $V_{\max}$  was determined at the indicated pH values, and the curve was fitted as described in Segel I.H. Enzyme Kinetics (Wiley Classic Library edition 1993, pp. 884-926) using the following equation  $V_{\max}(\text{pH}) = (V_{\max})^{\max} / (1 + [\text{H}^+]/K_{a1} + K_{a2}/[\text{H}^+])$ .  $(V_{\max})^{\max}$  is the pH-independent value of  $V_{\max}$ ; H is hydrogen ion concentration;  $K_{a1}$  and  $K_{a2}$  are acid dissociation constants corresponding to pK values on the acid and basic side of the curve, respectively. The following buffers were used: MES (pH 5.5 – 6.5), HEPES (pH 7.0 – 8.0), and TAPS (pH 8.5 – 9.0). Results are means  $\pm$  S.D. from at least two independent determinations.

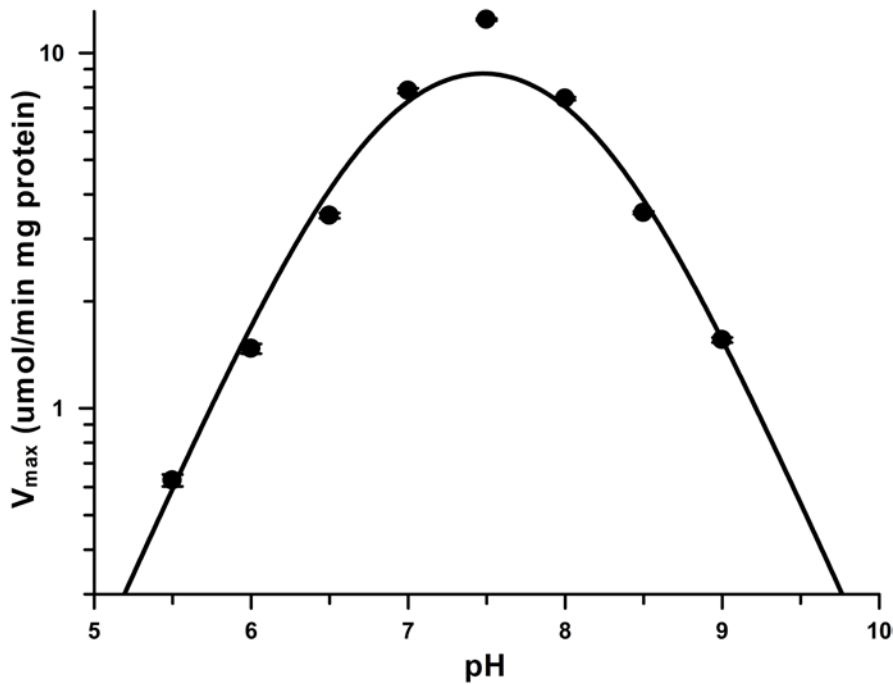



**Figure S5, related to Figures 4 and 5.** Structural superimposition of the wild type and D69A mutant YceF proteins. The protein ribbons and side chains are colored in different colours: yellow (wild type, PDB code 4JHC) and orange (D69A, PDB code 4LU1).

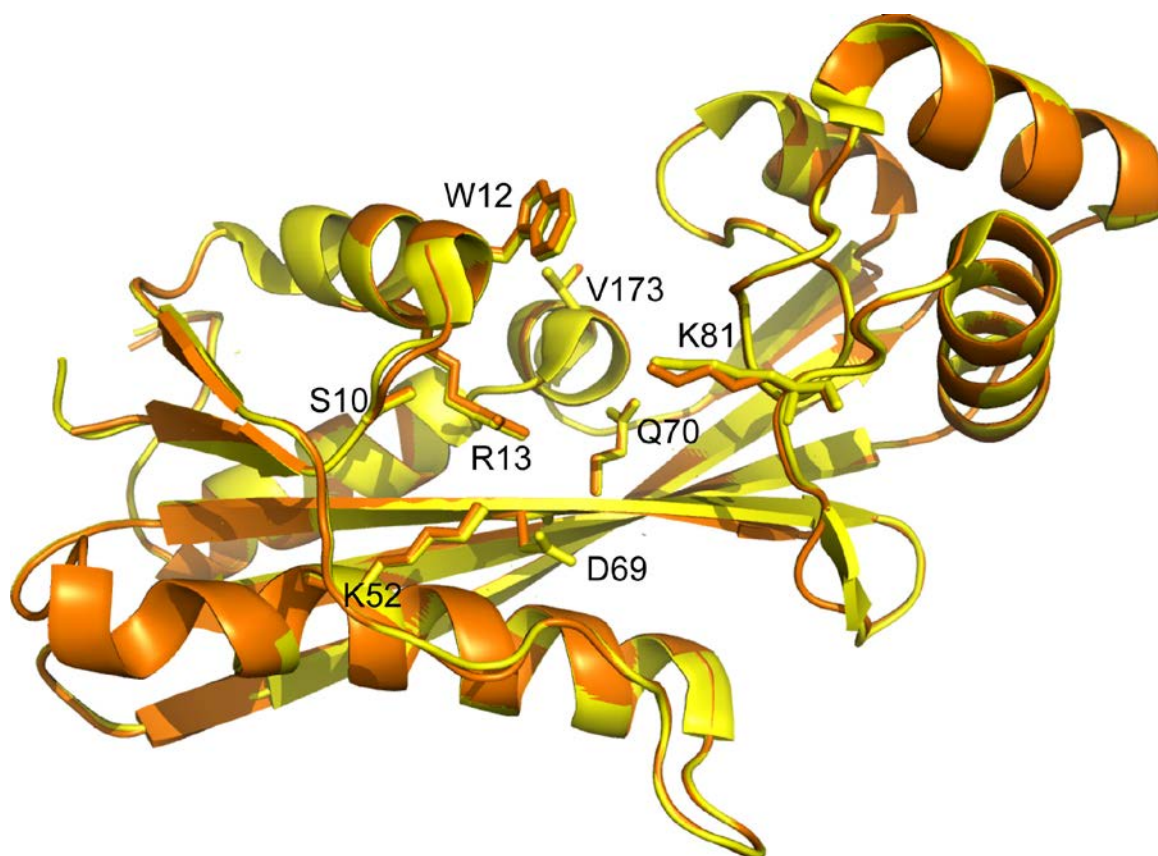

**Figure S6, related to Figure 5.** The pyrophosphate-like electron density found in the active site of BSU28050 (PDB code 4HEB). Total omit map was calculated with SFCHECK from CCP4 suite (contoured at  $1\ \sigma$ ) and revealed an additional electron density in the same position as phosphate in the ASMTL-Maf structure (PDB code 2P5X).

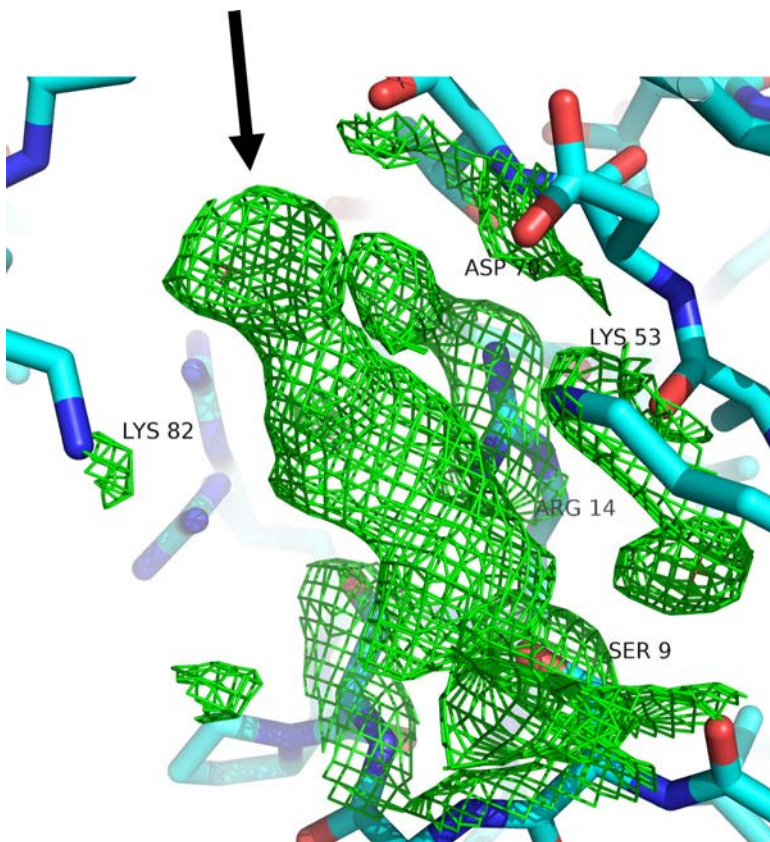

**Figure S7, related to Figure 6.** Structural basis for modified nucleotide binding in the active site of BSU28050. Manual docking of the modified nucleotide structures in the BSU28050 active site: **(A)**, pseudoUTP; **(B)**, m<sup>5</sup>CTP; **(C)**, CTP. **(A)**, The recognition of pseudo-UTP can be mediated by the conserved bound water molecule (shown as the cyan sphere with H-bonds). **(B)**, Binding of m<sup>5</sup>CTP after a minor alteration of the Gln153 side chain conformation. **(C)**, Unlike m<sup>5</sup>CTP, the canonical cytosine base (turquoise) may be recognised in an alternative conformation resulting in non-productive binding of CTP in the active site.

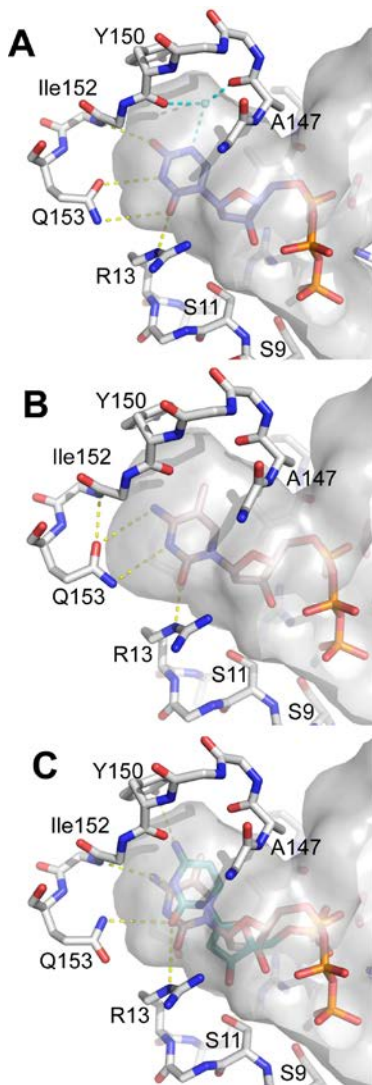

Supplement: mmc1.pdf [file mmc1.pdf]
